# Supplementary material for: Avatar-Based Patient Monitoring With Peripheral Vision: A Multicenter Comparative Eye-Tracking Study
Source: PubMed Central journal article supplement (PMC6668297; doi:10.2196/13041), 2019-07-17

# Supplementary material

**Avatar-based patient  
monitoring with peripheral  
vision.**

# Gazeplots

## Scenario 1

# KSW Scenario 1 (Participant 1)

Gazepoint Analysis Standard Edition (v3.5.0) x86

New Project Open Project Save Project Calibrate Collect Data Analyze Data Visualization Gaze Video Thinkaloud Show Cursor AOI Export

Media List

| Name   | TI  | Style   | Path |
|--------|-----|---------|------|
| New... | 0.0 | Scre... |      |

Recording List

| Name                                        | D... | A | G. |
|---------------------------------------------|------|---|----|
| <input type="checkbox"/> USZ1               | 5... | 0 | F  |
| <input checked="" type="checkbox"/> User 16 | 9... | 0 | M  |
| <input type="checkbox"/> User 17            | 3... | 0 | M  |

AOI List

| Name | Vi... | 1s... | Vi... | Vi... | R... | R... |
|------|-------|-------|-------|-------|------|------|
|------|-------|-------|-------|-------|------|------|

PowerPoint Slide Show - Presentation1 - PowerPoint

Slide 1 of 1

Control: RX Remote: -- Recording: Off

Project: C:\Users\VisualPatient\Desktop\vpv\pilot.prj

Time 00:11:49.862  
Total 00:15:54.966

DEU 10:22  
SG 25.09.2018

DEU 10:36  
SG 25.09.2018

# KSW Scenario 1 (Participant 2)

Gazeport Analysis Standard Edition (v3.5.0) x86

New Project Open Project Save Project Calibrate Collect Data Analyze Data Visualization Gaze Video Thinkaloud Show Cursor AOI Export

Media List

| Name   | TI  | Style   | Path |
|--------|-----|---------|------|
| New... | 0.0 | Scre... |      |

Recording List

| Name                                | D... | A    | G.  |
|-------------------------------------|------|------|-----|
| <input type="checkbox"/>            | USZ1 | 5... | 0 F |
| <input checked="" type="checkbox"/> | ksw2 | 8... | 0 M |

AOI List

| Name | Vi... | 1s... | Vi... | Vi... | R... | R... |
|------|-------|-------|-------|-------|------|------|
|------|-------|-------|-------|-------|------|------|

Time 00:13:18.494  
Total 00:14:44.436  
Snapshot Register

Control: RX Remote: -- Recording: Off Project: C:\Users\VisualPatient\Desktop\ppv\pilot.prj

DEU 12:05  
SG 25.09.2018

## KSW Scenario 1 (Participant 3)

- No data

## KSW Scenario 1 (Participant 4)

- No data

## KSW Scenario 1 (Participant 5)

- No data

# KSW Scenario 1 (Participant 6)

Gazeport Analysis Standard Edition (v3.5.0) x86

New Project Open Project Save Project Calibrate Collect Data Analyze Data Visualization Gaze Video Thinkaloud Show Cursor AOI Export

Media List

| Name   | Ti  | Style   | Path |
|--------|-----|---------|------|
| New... | 0.0 | Scre... |      |

Recording List

| Name                                | D... | A    | G.  |
|-------------------------------------|------|------|-----|
| <input type="checkbox"/>            | ksw5 | 7... | 0 M |
| <input type="checkbox"/>            | ksw6 | 7... | 0 M |
| <input checked="" type="checkbox"/> | ksw7 | 9... | 0 M |

AOI List

| Name | Vi... | 1s... | Vi... | Vi... | R... | R... |
|------|-------|-------|-------|-------|------|------|
|      |       |       |       |       |      |      |

PowerPoint Slide Show - Presentation1 - PowerPoint

Slide 1 of 1

Control: RX Remote: -- Recording: Off

Project: C:\Users\VisualPatient\Desktop\pvpv\pilot.prj

Time 00:10:10.478 DEU 11:56  
Total 00:15:24.818 SG 26.09.2018

Time 12:14 DEU  
Total 26.09.2018 SG



## KSW Scenario 1 (Participant 7)

- No data

## KSW Scenario 1 (Participant 8)

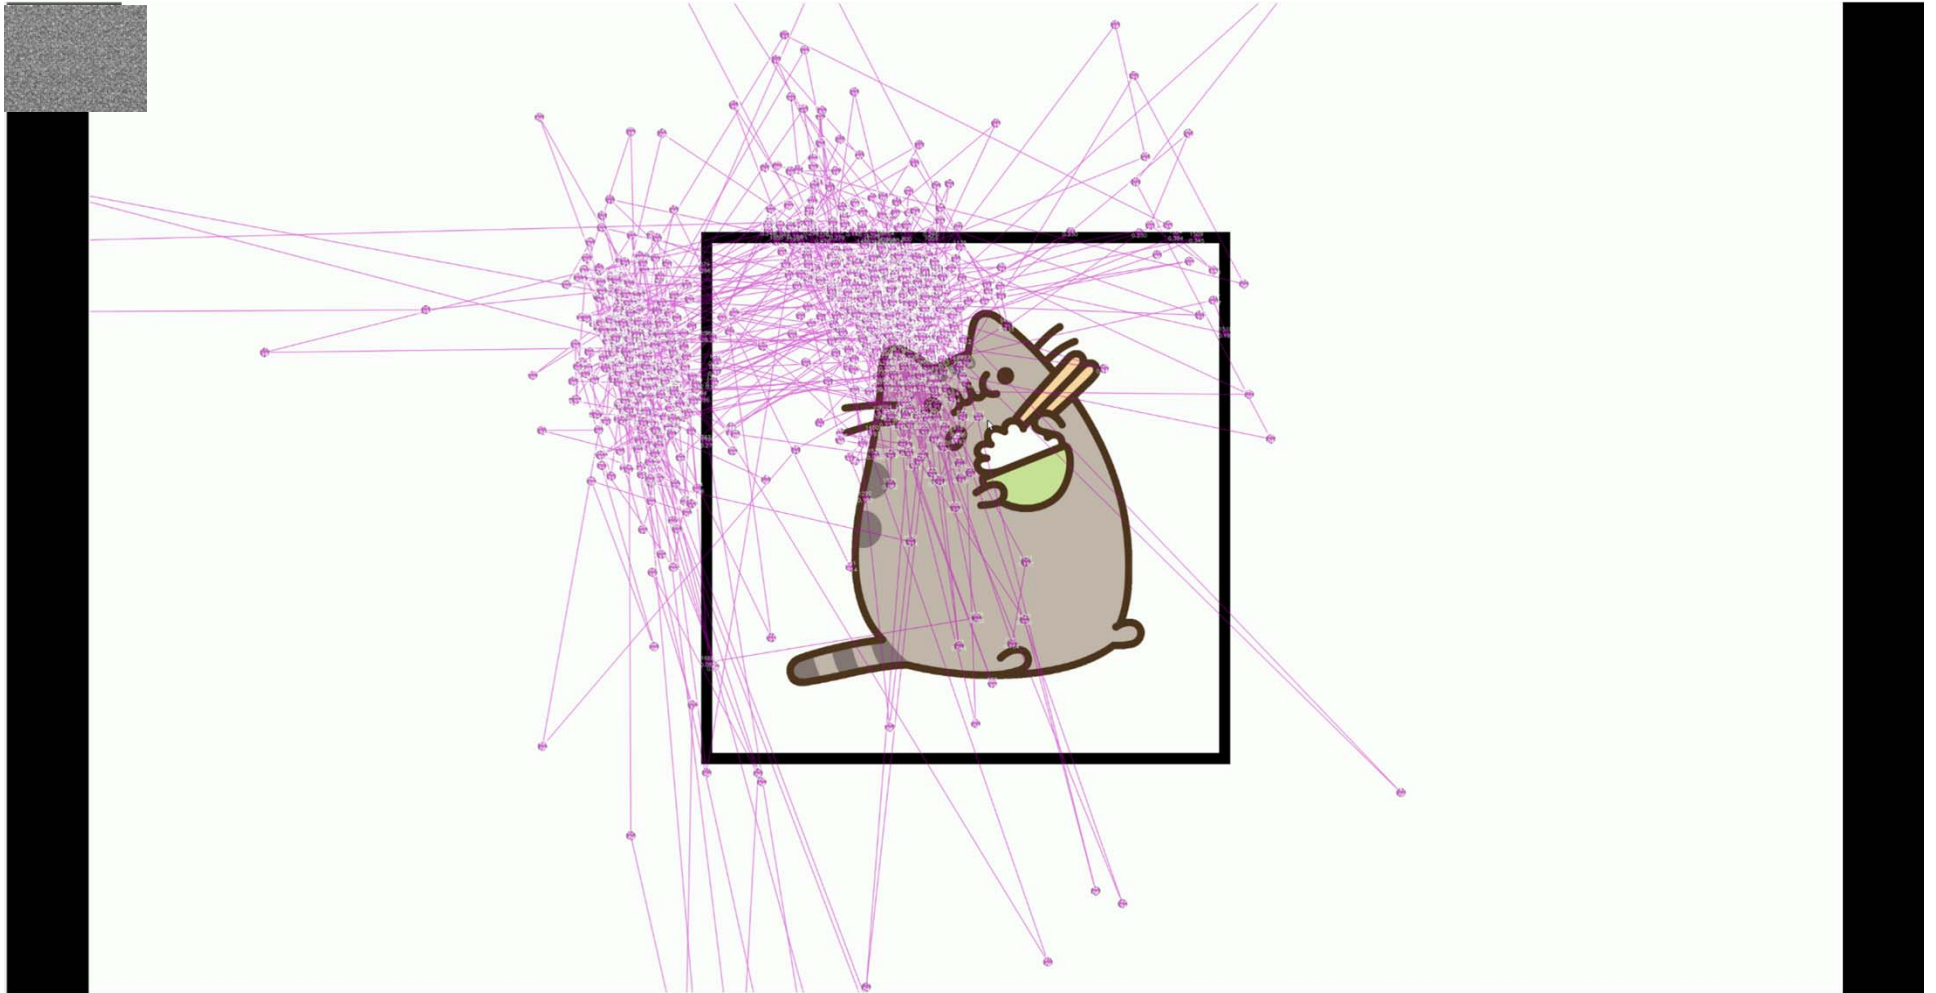

# KSW Scenario 1 (Participant 9)

PowerPoint Slide Show - Presentation1 - PowerPoint

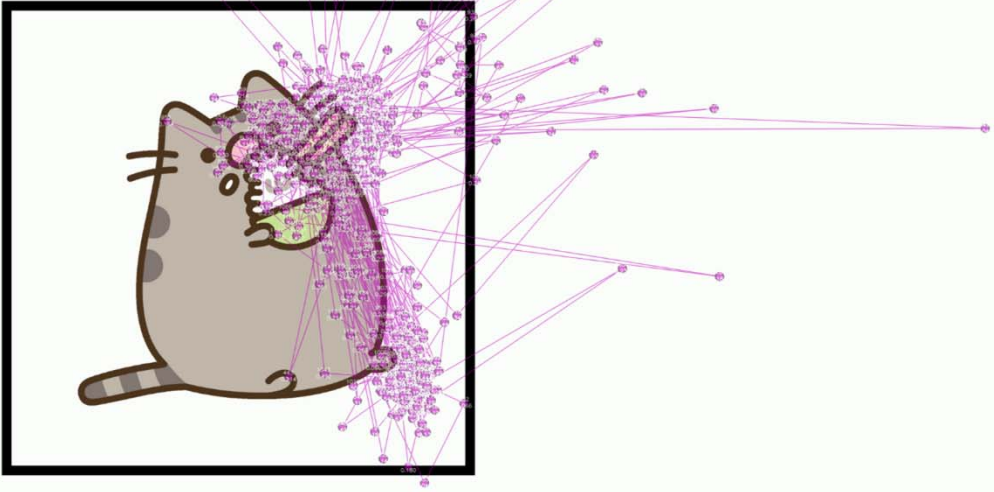

Slide 1 of 1

DEU 17:40  
SG 26.09.2018

The image shows a PowerPoint slide with a network graph visualization. The graph is composed of many small purple nodes connected by thin purple lines. A large, dense cluster of nodes is centered on the face of a cartoon cat, which is the central image on the slide. From this central cluster, several lines radiate outwards to other nodes scattered across the slide area. The cat is a brown and white cartoon character with a large, open mouth. The background of the slide is light green. The PowerPoint interface is visible at the top and bottom, including the title bar, navigation icons, and the Windows taskbar at the very bottom.

# KSW Scenario 1 (Participant 10)

PowerPoint Slide Show - Presentation1 - PowerPoint

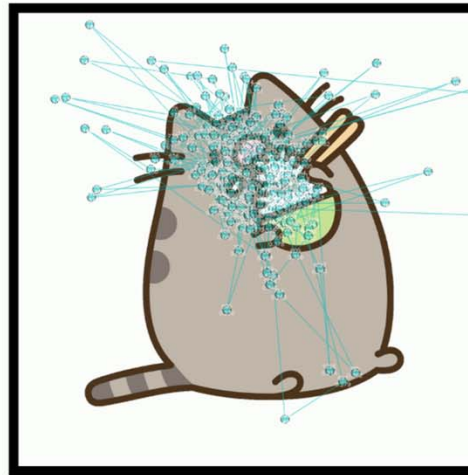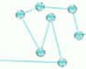

Slide 1 of 1

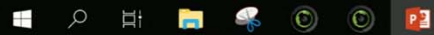

Navigation icons for the slide show, including back, forward, and search symbols. The system tray shows the date and time: DEU 10:16, SG 27.09.2018.

# KSW Scenario 1 (Participant 11)

PowerPoint Slide Show - Presentation1 - PowerPoint

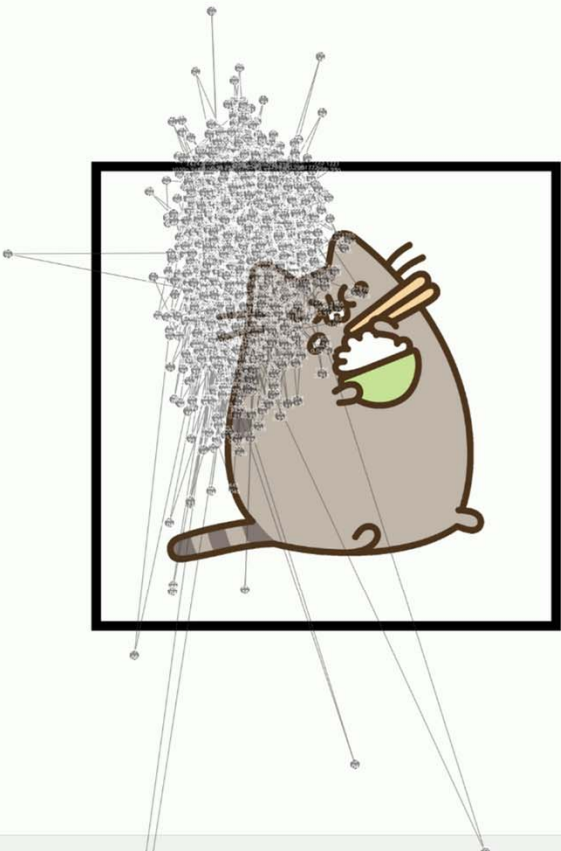

Slide 1 of 1

DEU 11:48  
SG 27.09.2018

The image displays a PowerPoint presentation window. The main slide area is light green and contains a cartoon illustration of a pig eating from a bowl. A complex network of grey nodes and lines is overlaid on the bowl, extending upwards and outwards, suggesting a data visualization or network graph. The window title bar at the top reads "PowerPoint Slide Show - Presentation1 - PowerPoint". The bottom status bar shows "Slide 1 of 1" on the left and system information "DEU 11:48 SG 27.09.2018" on the right. The Windows taskbar is visible at the very bottom of the screen.

# KSW Scenario 1 (Participant 12)

PowerPoint Slide Show - Presentation1 - PowerPoint

Slide 1 of 1

DEU 14:11  
SG 27.09.2018

The image displays a PowerPoint presentation window titled "PowerPoint Slide Show - Presentation1 - PowerPoint". The main content area shows a slide with a cartoon illustration of a grey cat with black spots, sitting and eating a green, round object with a yellow stick (possibly a piece of food or a pencil). The illustration is enclosed in a black rectangular frame. Overlaid on the slide is a complex network diagram consisting of numerous small red circular nodes connected by thin red lines. The network is most dense around the cat's mouth and extends outwards, particularly towards the bottom right corner of the slide. The background of the slide is white. The bottom of the window shows a taskbar with various application icons and a system tray on the right displaying the date and time: "DEU 14:11 SG 27.09.2018".

# KSW Scenario 1 (Participant 13)

PowerPoint Slide Show - Presentation1 - PowerPoint

Slipping Text

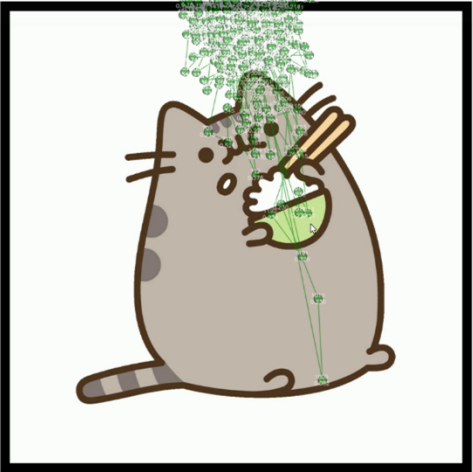

Slide 1 of 1

DEU 15:37  
SG 27.09.2018

The image shows a PowerPoint slide during a presentation. The slide features a cartoon illustration of a grey cat with a green object in its mouth, enclosed in a black rectangular frame. A network graph, consisting of numerous green nodes connected by thin lines, is overlaid on the cat's head and extends upwards. The text 'Slipping Text' is visible in the upper left corner of the slide area. The PowerPoint window title bar reads 'PowerPoint Slide Show - Presentation1 - PowerPoint'. The Windows taskbar at the bottom shows 'Slide 1 of 1' and the system tray with the date and time 'DEU 15:37 SG 27.09.2018'.

## KSW Scenario 1 (Participant 14)

Not included in the data analysis due to view to the left.

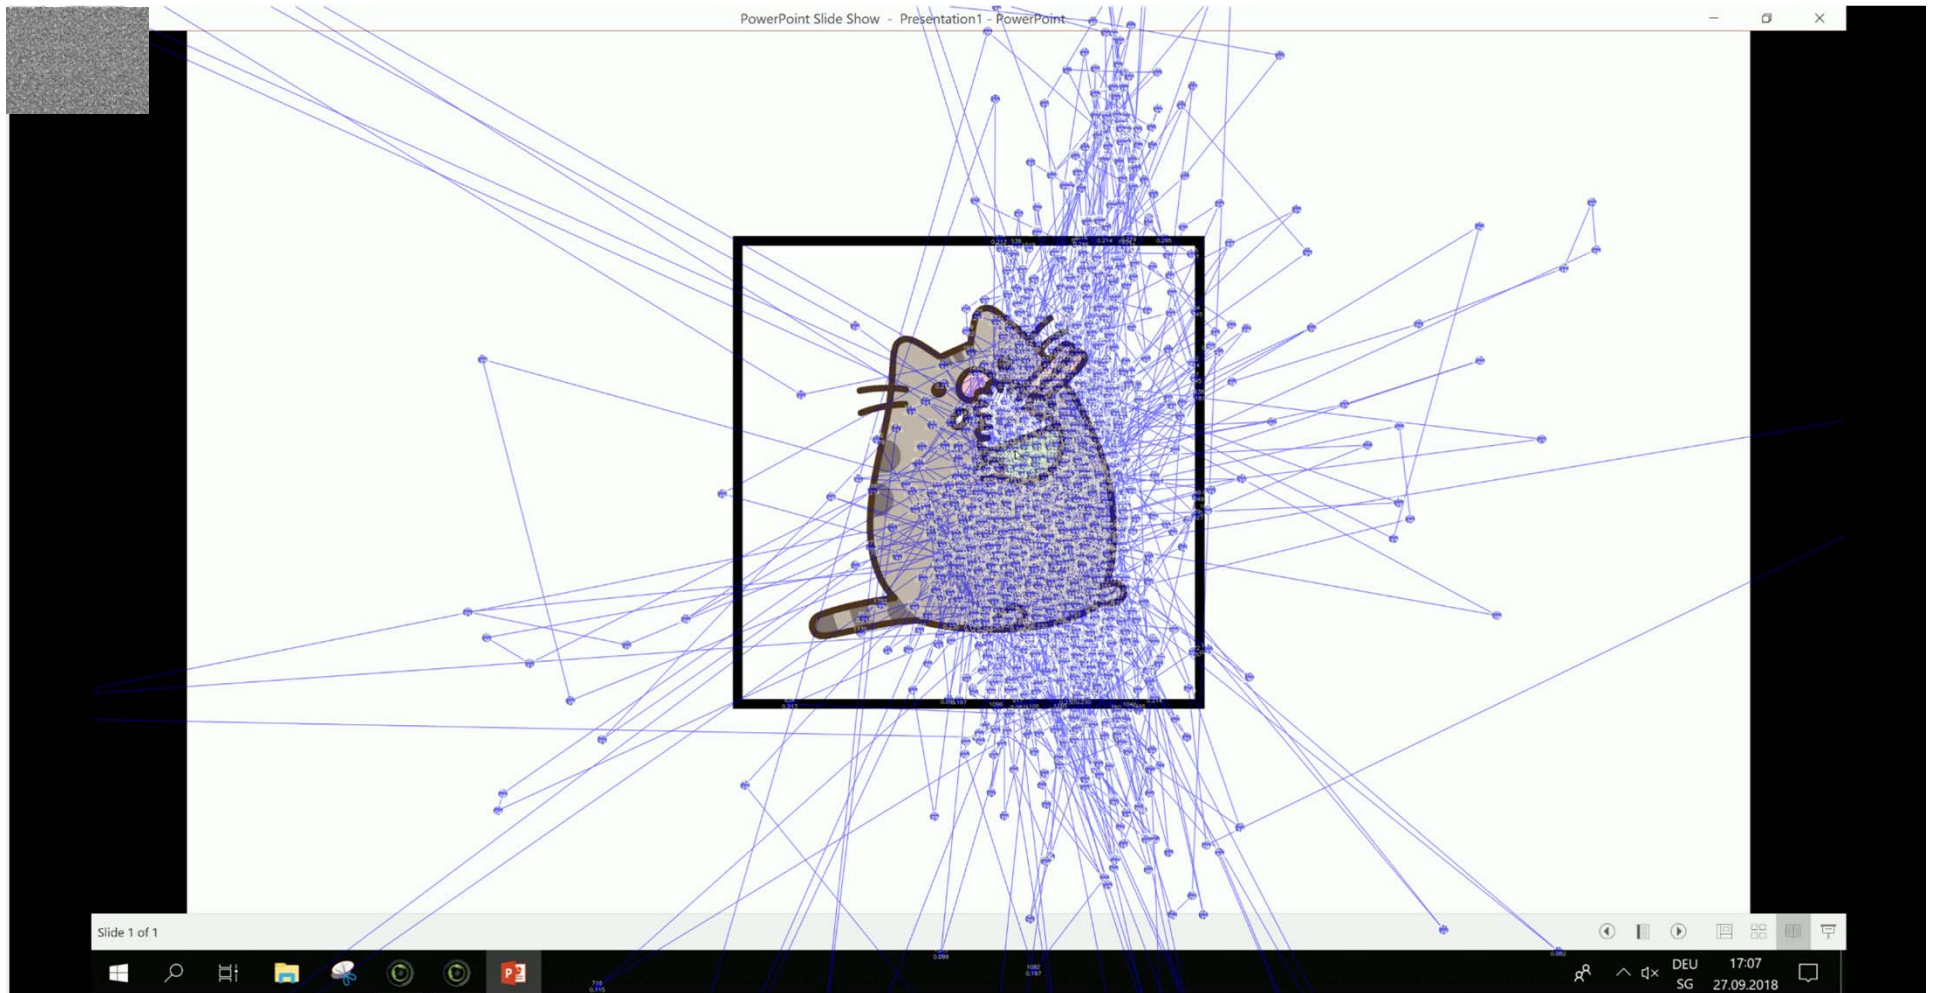



# USZ Szenario 1 (Participant 15)

GazePoint Analysis Standard Edition (v3.5.0) x86

New Project Open Project Save Project Calibrate Collect Data Analyze Data Visualization Gaze Video Thinkaloud Show Cursor AOI Export

Media List

| Name   | Ti  | Style   | Path |
|--------|-----|---------|------|
| New... | 0.0 | Scre... |      |

Recording List

| Name                                     | D... | A | G. |
|------------------------------------------|------|---|----|
| <input checked="" type="checkbox"/> USZ1 | 5... | 0 | F  |

AOI List

| Name | Vi... | 1s... | Vi... | Vi... | R... | R... |
|------|-------|-------|-------|-------|------|------|
|------|-------|-------|-------|-------|------|------|



The screenshot displays the GazePoint Analysis Standard Edition (v3.5.0) x86 interface. The main workspace shows a cartoon illustration of a brown cat eating from a bowl. The cat's face and the bowl are overlaid with a network of green dots and lines, representing gaze data points and areas of interest (AOI). The software's toolbar includes icons for New Project, Open Project, Save Project, Calibrate, Collect Data, Analyze Data, Visualization, Gaze Video, Thinkaloud, Show Cursor, AOI, and Export. The left sidebar contains a Media List, a Recording List with a table showing a recording named 'USZ1' with a duration of 5... and a status of 0 F, and an AOI List table with columns for Name, Vi..., 1s..., Vi..., Vi..., R..., and R....

# USZ Szenario 1 (Participant 16)

Gazepoint Analysis Standard Edition (v3.5.0) x86

New Project Open Project Save Project Calibrate Collect Data Analyze Data Visualization Gaze Video Thinkaloud Show Cursor AOI Export

Media List

| Name | TI  | Style   | Path |
|------|-----|---------|------|
| vppn | 0.0 | Scre... |      |

Recording List

| Name                                      | D... | A | G. |
|-------------------------------------------|------|---|----|
| <input type="checkbox"/> User 1           | 1    | 0 | M  |
| <input type="checkbox"/> User 2           | 9.9  | 0 | M  |
| <input checked="" type="checkbox"/> USZ 2 | 7... | 0 | M  |

AOI List

| Name | Vi... | 1s... | Vi... | Vi... | R... | R... |
|------|-------|-------|-------|-------|------|------|
|------|-------|-------|-------|-------|------|------|

PowerPoint Slide Show - Presentation1 - PowerPoint

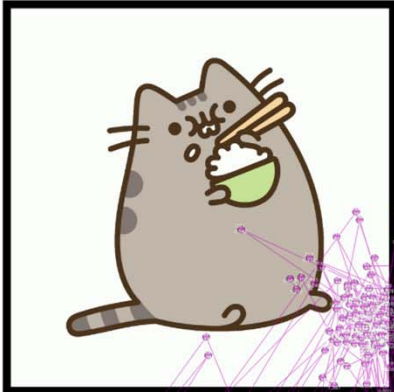

Slide 1 of 1

Project: C:\Users\VisualPatient\Desktop\vppv\David neu.prj

Time 00:11:39.091  
Total 00:11:51.044

DEU 09:48  
SG 28.09.2018

Control: -- Remote: -- Recording: Off

# USZ Szenario 1 (Participant 17)

The image shows a screenshot of a PowerPoint presentation window titled "PowerPoint Show - Presentation1 - PowerPoint". The main content area features a cartoon illustration of a brown cat with a white patch on its chest, eating a green bowl of food. This illustration is enclosed in a black rectangular frame. A complex network graph is overlaid on the slide, consisting of numerous small blue circular nodes connected by thin, light blue lines. The nodes are densely clustered around the top and right sides of the cat's head, with lines extending across the slide. The bottom of the screen displays the Windows taskbar with various application icons, including the Start button, search, task view, file explorer, and several instances of the PowerPoint application. The system tray on the right shows the date and time as "DEU 11:23" and "SG 28.09.2018". The bottom-left corner of the presentation window indicates "Slide 1 of 1".

# USZ Szenario 1 (Participant 18)

The image shows a screenshot of a PowerPoint presentation window. The title bar at the top reads "PowerPoint Slide Show - Presentation1 / PowerPoint". The main slide area features a cartoon illustration of a grey cat with a white belly, sitting and eating a green, cone-shaped treat with a yellow stick. The cat is enclosed in a black rectangular frame. A dense network of red lines and small red circular nodes is overlaid on the slide, primarily concentrated on the left side of the frame and extending towards the center. The nodes are connected by thin red lines, creating a complex web-like structure. The background of the slide is light green. At the bottom of the window, there is a taskbar with various icons, including the Windows logo, search, task view, file explorer, and PowerPoint. The system tray on the right shows the time as 14:25, the date as 28.09.2018, and the location as DEU SG. The status bar at the bottom left of the slide area indicates "Slide 1 of 1".

# USZ Szenario 1 (Participant 19)

The screenshot displays the GazePoint Analysis Standard Edition (v3.5.0) x86 software interface. The main window shows a PowerPoint slide titled "PowerPoint Slide Show - Presentation1 - Powerpoint" containing a cartoon cat eating a fish. The cat is enclosed in a black rectangular box, and numerous red lines radiate from it, representing gaze data points and movement paths. The software interface includes a top toolbar with icons for New Project, Open Project, Save Project, Collect Data, Analyze Data, Visualization, Gaze Video, Thinkaloud, Show Cursor, AOI, and Export. On the left side, there are panels for Media List, Recording List, and AOI List. The Recording List panel contains the following data:

| Name                                      | D... | A | G. |
|-------------------------------------------|------|---|----|
| <input type="checkbox"/> ksw22            | 6... | 0 | M  |
| <input type="checkbox"/> User 19          | 5... | 0 | M  |
| <input checked="" type="checkbox"/> usz12 | 6... | 0 | F  |

The bottom status bar shows the project path: "Project: C:\Users\VisualPatient\Desktop\pppv\David neu.prj". The system tray at the bottom right displays the time as 08:52 on 05.10.2018, along with system icons for network, volume, and power.

## USZ Scenario 1 (Participant 20)

Not included in the data analysis due to view to the left.

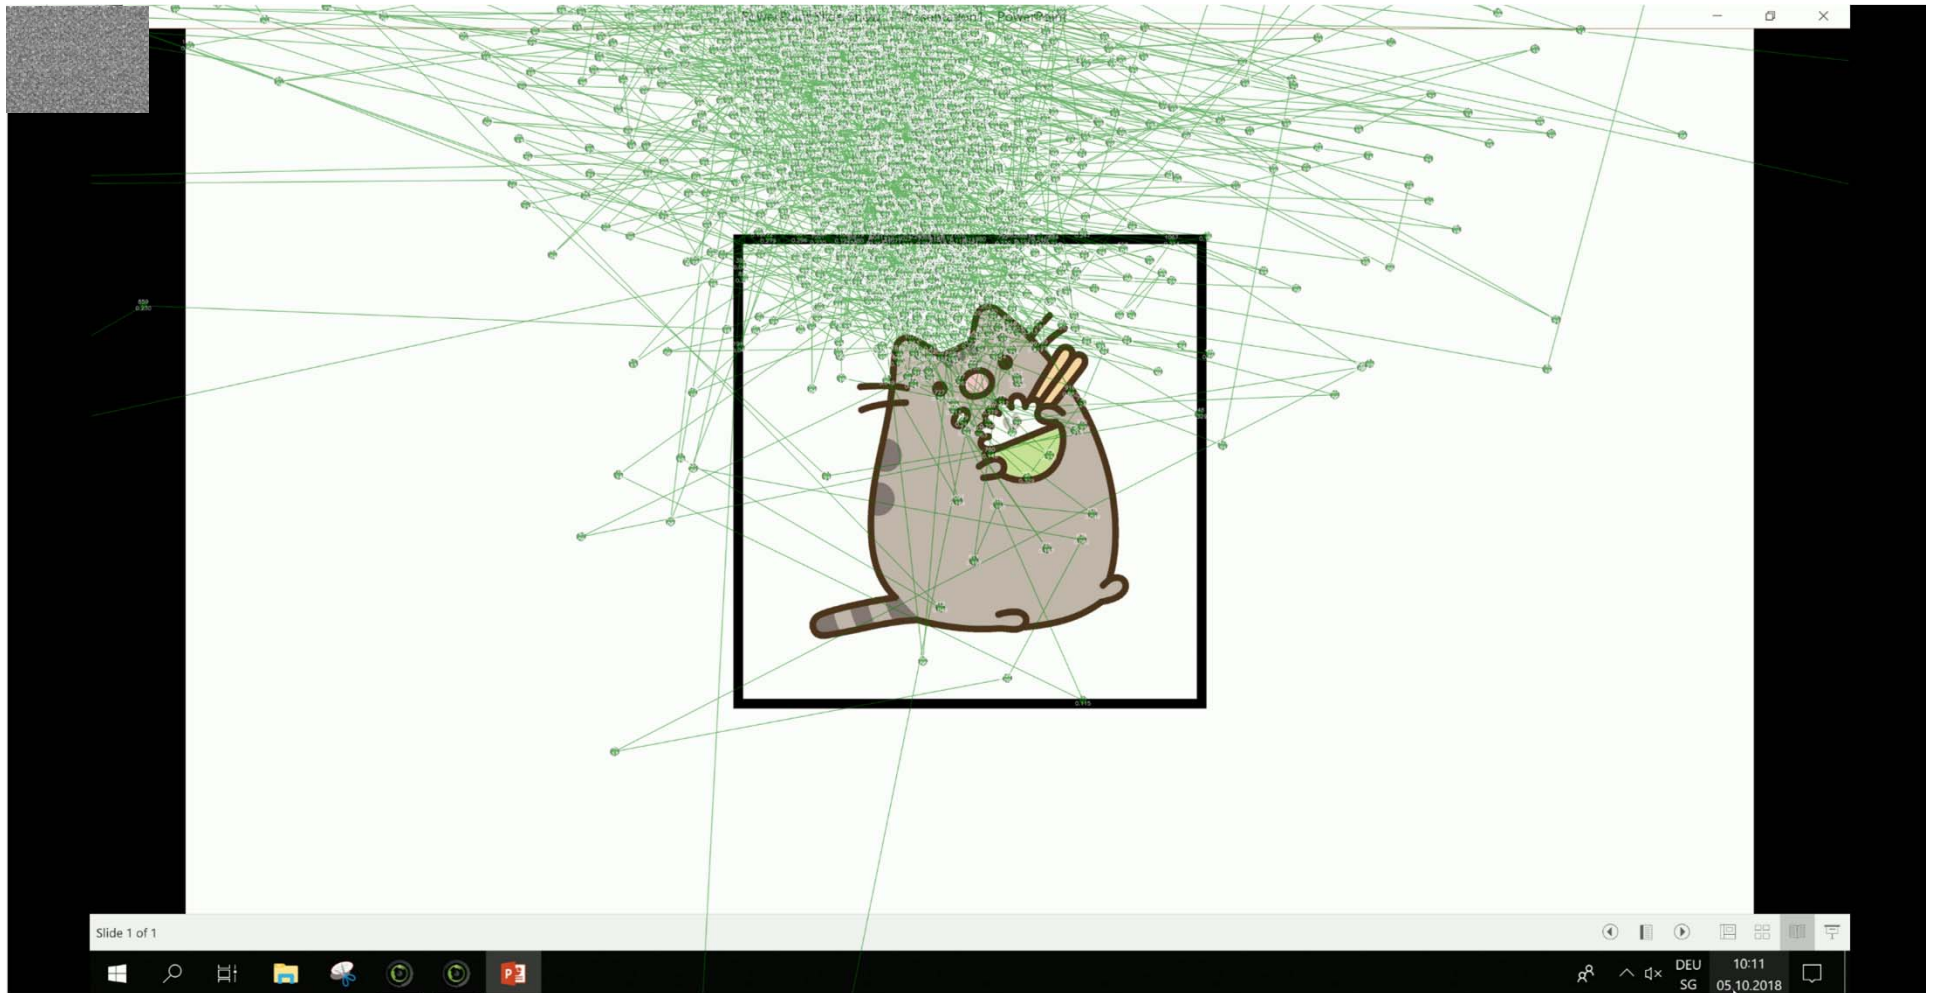



# USZ Szenario 1 (Participant 21)

Gazepoint Analysis Standard Edition (v3.5.0) x86

New Project Open Project Save Project Calibrate Collect Data Analyze Data Visualization Gaze Video Thinkaloud Show Cursor AOI Export

Media List

| Name | TI  | Style   | Path |
|------|-----|---------|------|
| vppn | 0.0 | Scre... |      |

Recording List

| Name                                | D...    | A    | G.  |
|-------------------------------------|---------|------|-----|
| <input type="checkbox"/>            | User 23 | 4.4  | 0 M |
| <input type="checkbox"/>            | User 24 | 5.1  | 0 M |
| <input checked="" type="checkbox"/> | usz15   | 6... | 0 M |

AOI List

| Name | Vi... | 1s... | Vi... | Vi... | R... | R... |
|------|-------|-------|-------|-------|------|------|
|------|-------|-------|-------|-------|------|------|

PowerPoint Slide Show - Presentation1 - PowerPoint

Slide 1 of 1

Control: RX Remote: -- Recording: Off

Project: C:\Users\VisualPatient\Desktop\vppv\David neu.prj

Time 00:10:34.895  
Total 00:10:42.002

DEU 13:27  
SG 05.10.2018

Snapshot Register

# USZ Szenario 1 (Participant 22)

The image is a screenshot of a PowerPoint presentation window. The title bar at the top reads "PowerPoint Slide Show - Presentation1 - PowerPoint". The main slide area is white and features a central cartoon illustration of a brown cat with a white belly, holding a green object. This illustration is enclosed in a black rectangular frame. A dense network of yellow nodes and connecting lines is overlaid on the slide, primarily concentrated around the cat illustration and extending towards the top and right edges of the slide. The network consists of numerous small yellow circular nodes connected by thin yellow lines, creating a complex web-like structure. The bottom of the screen shows the Windows taskbar with various application icons and the system tray displaying the date and time as "DEU 15:29 SG 05.10.2018". The status bar at the bottom left of the PowerPoint window indicates "Slide 1 of 1".



Gazeplots

Scenario 2

## KSW Szenario 2 (Participant 23)

PowerPoint Slide Show - Presentation1 - PowerPoint

Slide 1 of 1

DEU 10:17  
03/30/2018

# KSW Szenario 2 (Participant 24)

Gazepoint Analysis Standard Edition (v3.5.0) x86

New Project Open Project Save Project Calibrate Collect Data Analyze Data Visualization Gaze Video Thinkaloud Show Cursor AOI Export

Media List

| Name | TI  | Style   | Path |
|------|-----|---------|------|
| vppn | 0.0 | Scre... |      |

Recording List

| Name                                | D...  | A    | G.  |
|-------------------------------------|-------|------|-----|
| <input type="checkbox"/>            | usz10 | 8... | 0 M |
| <input type="checkbox"/>            | ksw16 | 9... | 0 M |
| <input checked="" type="checkbox"/> | ksw17 | 7... | 0 M |

AOI List

| Name | Vi... | 1s... | Vi... | Vi... | R... | R... |
|------|-------|-------|-------|-------|------|------|
|------|-------|-------|-------|-------|------|------|

PowerPoint Slide Show - Presentation1 - PowerPoint

Slide 1 of 1

Control: RX Remote: -- Recording: Off

Project: C:\Users\VisualPatient\Desktop\vppv\David neu.prj

Time 00:12:51.819  
Total 00:13:03.382

DEU 11:45  
SG 02.10.2018

DEU 11:51  
SG 02.10.2018

# KSW Szenario 2 (Participant 25)

Gazepoint Analysis Standard Edition (v3.5.0) x86

New Project Open Project Save Project Calibrate Collect Data Analyze Data Visualization Gaze Video Thinkaloud Show Cursor AOI Export

Media List

| Name | TI  | Style   | Path |
|------|-----|---------|------|
| vppn | 0.0 | Scre... |      |

Recording List

| Name                                | D...  | A    | G.  |
|-------------------------------------|-------|------|-----|
| <input type="checkbox"/>            | ksw16 | 9... | 0 M |
| <input type="checkbox"/>            | ksw17 | 7... | 0 M |
| <input checked="" type="checkbox"/> | ksw18 | 9... | 0 M |

AOI List

| Name | Vi... | 1s... | Vi... | Vi... | R... | R... |
|------|-------|-------|-------|-------|------|------|
|------|-------|-------|-------|-------|------|------|

PowerPoint Slide Show - Presentation1 - PowerPoint

Slide 1 of 1

Control: RX Remote: -- Recording: Off

Project: C:\Users\VisualPatient\Desktop\vppv\David neu.prj

Time 00:15:01.137  
Total 00:15:08.587

DEU 14:38  
SG 02.10.2018

DEU 14:41  
SG 02.10.2018

# KSW Szenario 2 (Participant 26)

Gazepoint Analysis Standard Edition (v3.5.0) x86

New Project Open Project Save Project Calibrate Collect Data Analyze Data Visualization Gaze Video Thinkaloud Show Cursor AOI Export

Media List

| Name | TI  | Style   | Path |
|------|-----|---------|------|
| vppn | 0.0 | Scre... |      |

Recording List

| Name                                | D...  | A    | G.  |
|-------------------------------------|-------|------|-----|
| <input type="checkbox"/>            | ksw17 | 7... | 0 M |
| <input type="checkbox"/>            | ksw18 | 9... | 0 M |
| <input checked="" type="checkbox"/> | ksw19 | 6... | 0 F |

AOI List

| Name | Vi... | 1s... | Vi... | Vi... | R... | R... |
|------|-------|-------|-------|-------|------|------|
|------|-------|-------|-------|-------|------|------|

PowerPoint Slide Show - Presentation1 - PowerPoint

Slide 1 of 1

Control: RX Remote: -- Recording: Off

Project: C:\Users\VisualPatient\Desktop\vppv\David neu.prj

Time 00:10:39.908  
Total 00:11:01.890

DEU 15:45  
SG 02.10.2018

DEU 15:50  
SG 02.10.2018

## KSW Szenario 2 (Participant 27)

The image shows a screenshot of a PowerPoint slide show. The main content is a network diagram on a light green background. At the center is a cartoon illustration of a grey cat with a pink nose and a green patch on its chest, enclosed in a black rectangular frame. A dense cluster of small yellow nodes is positioned above the cat's head, with numerous thin yellow lines radiating outwards to other nodes scattered across the slide. A semi-transparent box labeled "Shipping Tool" is visible in the upper left quadrant. The window title bar at the top reads "PowerPoint Slide Show - Presentation1 - PowerPoint". The bottom status bar shows "Slide 1 of 1" on the left and system information on the right, including "DEU 10:10 SG 04.10.2018". The Windows taskbar is visible at the very bottom.

## KSW Szenario 2 (Participant 28)

PowerPoint Slide Show - Presentation1 - PowerPoint

Slide 1 of 1

DEU 11:49  
SG 04.10.2018

The image displays a PowerPoint presentation window titled "PowerPoint Slide Show - Presentation1 - PowerPoint". The main content area shows a slide with a light green background. In the center, there is a cartoon illustration of a grey cat's head, enclosed in a black rectangular frame. Overlaid on the cat's face is a complex network diagram. This diagram features a dense cluster of small purple circular nodes, with several lines radiating outwards to other nodes located further away from the cat's head. One specific node on the cat's forehead is highlighted with a small purple square. The slide is labeled "Slide 1 of 1" in the bottom-left corner. The Windows taskbar is visible at the bottom, showing various application icons and system information including the time "11:49" and date "04.10.2018".

## KSW Szenario 2 (Participant 29)

The image shows a screenshot of a PowerPoint slide show window titled "PowerPoint Slide Show - Presentation1 - PowerPoint". The slide content features a cartoon illustration of the cat Pusheen, which is sitting and eating a bowl of green soup with chopsticks. The illustration is enclosed in a black rectangular frame. A network graph is overlaid on the slide, with a dense cluster of blue nodes and connecting lines centered on the Pusheen illustration. Several lines radiate from this central cluster to other nodes scattered across the slide area. The bottom of the screenshot shows the Windows taskbar with various application icons and the system tray displaying the date "04.10.2018" and time "14:33".



## KSW Szenario 2 (Participant 30)

PowerPoint Slide Show - Presentation1 - PowerPoint

Slide 1 of 1

DEU 16:34  
SG 04.10.2018

The image displays a PowerPoint presentation window titled "PowerPoint Slide Show - Presentation1 - PowerPoint". The main content area shows a slide with a light green background. In the center, there is a cartoon illustration of a brown cat with a white chest, eating a yellow ice cream cone. The cat is enclosed in a thick black rectangular border. Overlaid on the slide is a complex network graph. The graph consists of numerous small grey circular nodes. A dense cluster of these nodes is positioned to the left of the cat's head. From this cluster, many thin grey lines radiate outwards, connecting to various points across the slide, including the corners and edges of the black border around the cat. The bottom of the window features a taskbar with several application icons (Windows, Search, File Explorer, etc.) and a system tray on the right showing the date and time as "DEU 16:34 SG 04.10.2018". The bottom-left corner of the slide area indicates "Slide 1 of 1".

## USZ Szenario 2 (Participant 31)

PowerPoint Slide Show - Presentation1 - PowerPoint

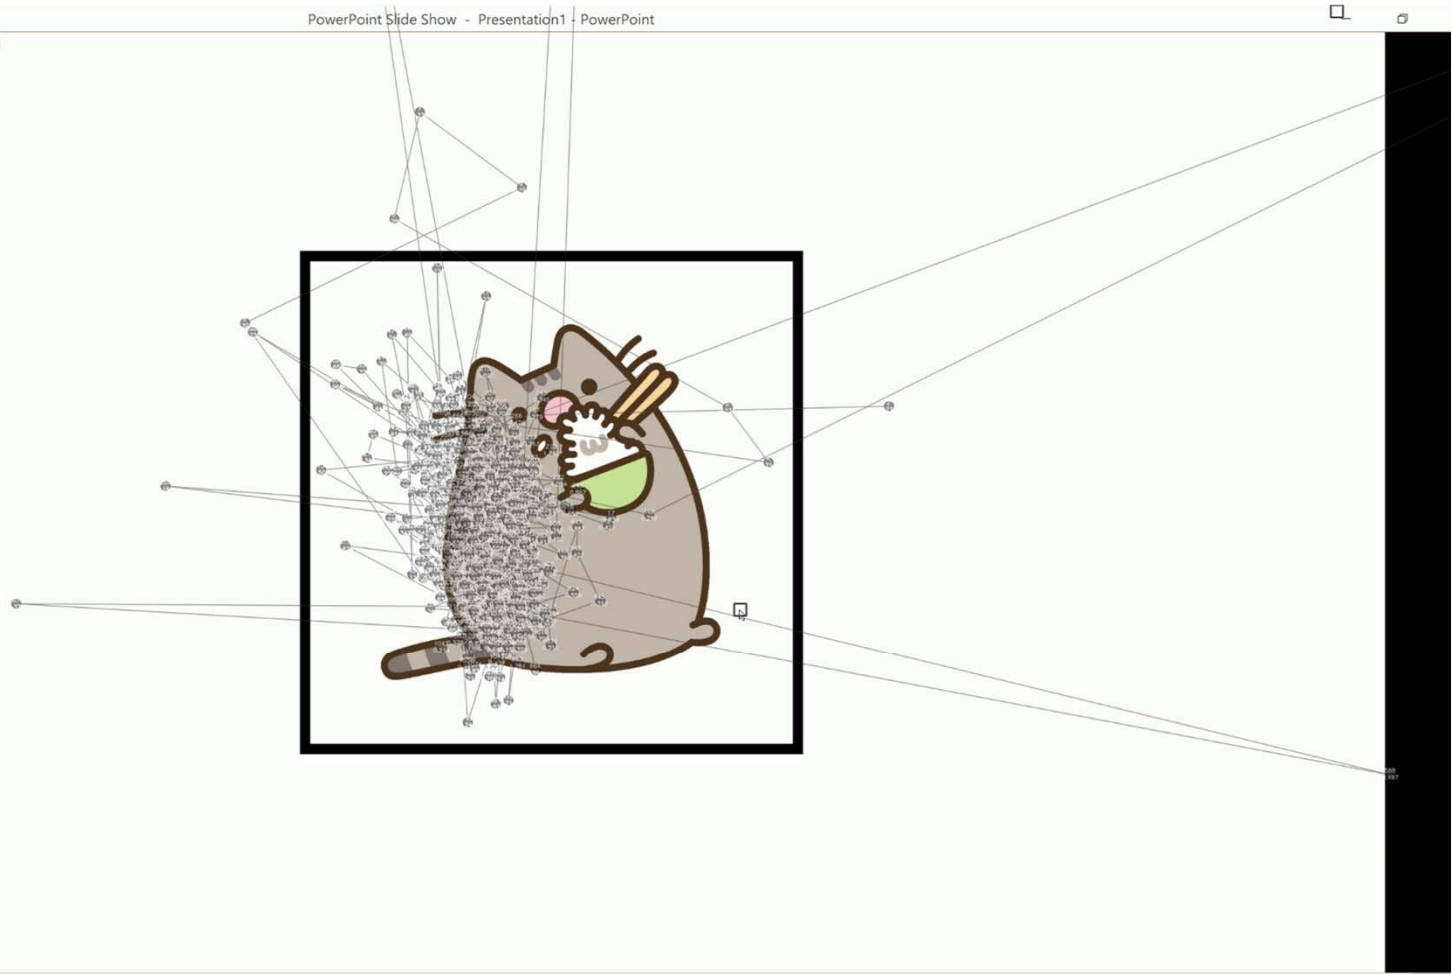

## USZ Scenario 2 (Participant 32)

Not included in the data analysis due to view to the left.

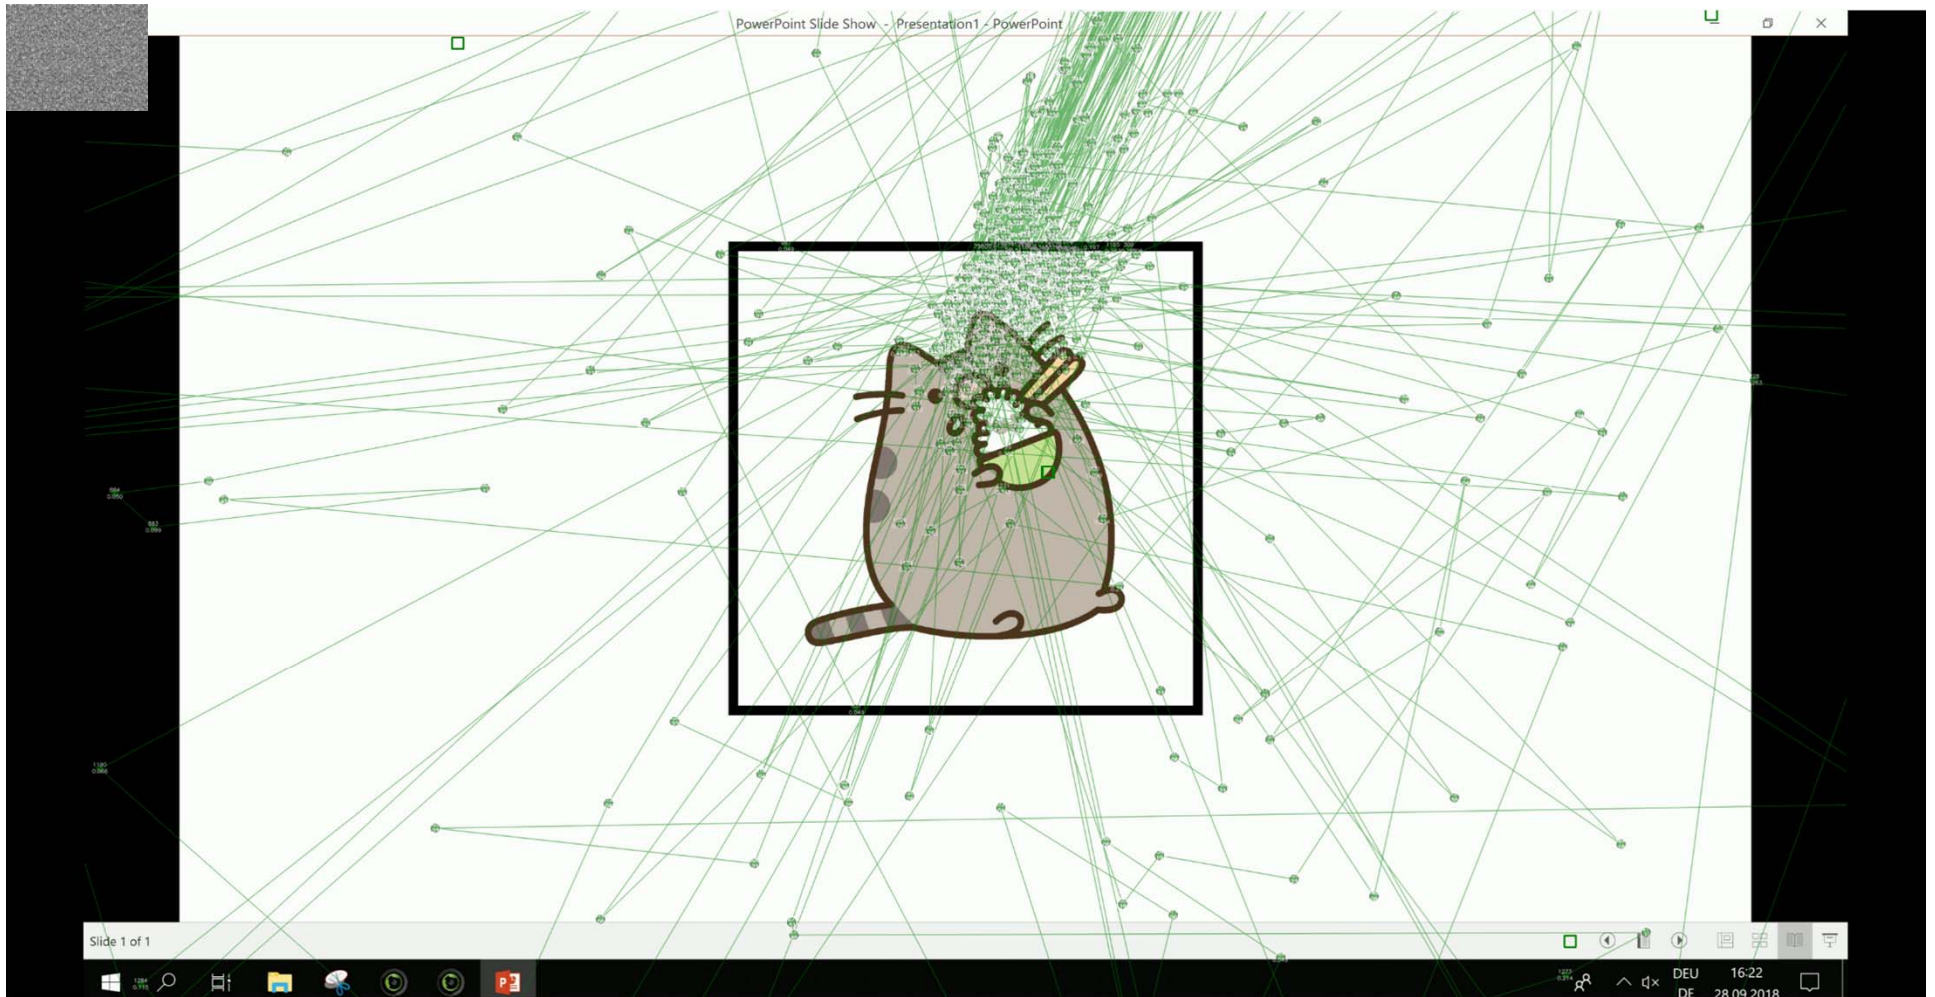

# USZ Szenario 2 (Participant 33)

PowerPoint Slide Show - Presentation1 - PowerPoint

Slide 1 of 1

DEU 09:13  
DE 01.10.2018

The image shows a screenshot of a PowerPoint slide show. The main content is a network diagram overlaid on a cartoon cat illustration. The cat is brown with a white chest and a small blue square on its chest. The network consists of numerous blue nodes connected by thin blue lines, forming a complex web that extends across the slide. The window title is "PowerPoint Slide Show - Presentation1 - PowerPoint". The taskbar at the bottom shows the Windows logo, search, task view, and several application icons. The system tray on the right shows the volume icon, network icon, and system clock displaying "DEU 09:13" and "DE 01.10.2018".

## USZ Szenario 2 (Participant 34)

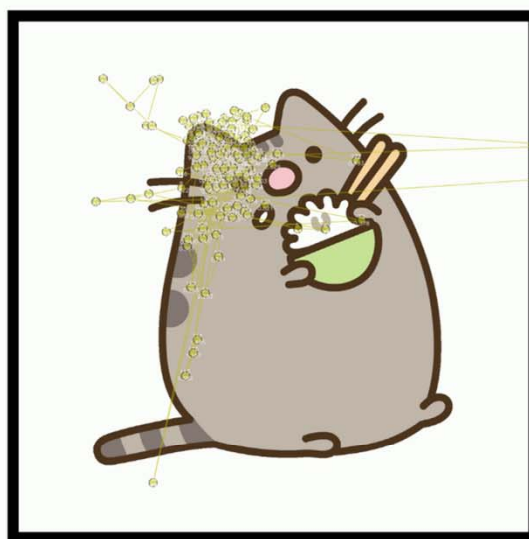

↳

## USZ Szenario 2 (Participant 35)

- No data

# USZ Szenario 2 (Participant 36)

PowerPoint Slide Show - Presentation1 - PowerPoint

Slide 1 of 1

DEU 15:15  
DE 01.10.2018

The image shows a PowerPoint slide in a slide show window. The slide features a cartoon illustration of a brown cat with a white patch on its chest, sitting and eating a green slice of pizza. The cat is enclosed in a black square frame. A complex network diagram is overlaid on the slide, consisting of numerous purple circular nodes connected by thin purple lines. A dense cluster of these nodes is centered on the cat's head, with many lines radiating outwards to other nodes scattered across the slide area. The network appears to be a visualization of relationships or connections. The slide is titled 'Slide 1 of 1' in the bottom left corner. The Windows taskbar is visible at the bottom, showing the system tray with the date '01.10.2018' and time '15:15', and the language 'DEU'. The window title bar at the top reads 'PowerPoint Slide Show - Presentation1 - PowerPoint'.



# USZ Szenario 2 (Participant 37)

Gazepoint Analysis Standard Edition (v3.5.0) x86

New Project Open Project Save Project Calibrate Collect Data Analyze Data Visualization Gaze Video Thinkaloud Show Cursor AOI Export

Media List

| Name | TI  | Style   | Path |
|------|-----|---------|------|
| vppn | 0.0 | Scre... |      |

Recording List

| Name                                | D...  | A    | G.  |
|-------------------------------------|-------|------|-----|
| <input type="checkbox"/>            | usz8  | 6... | 0 M |
| <input type="checkbox"/>            | usz9  | 7... | 0 M |
| <input checked="" type="checkbox"/> | usz10 | 8... | 0 M |

AOI List

| Name | Vi... | 1s... | Vi... | Vi... | R... | R... |
|------|-------|-------|-------|-------|------|------|
|------|-------|-------|-------|-------|------|------|

PowerPoint Slide Show - Presentation1 - PowerPoint

Slide 1 of 1

Control: RX Remote: -- Recording: Off

Project: C:\Users\VisualPatient\Desktop\vppv\David neu.prj

Time 00:14:17.769  
Total 00:14:36.088

DEU 17:41  
DE 01.10.2018

DEU 17:46  
DE 01.10.2018



## USZ Szenario 2 (Participant 38)

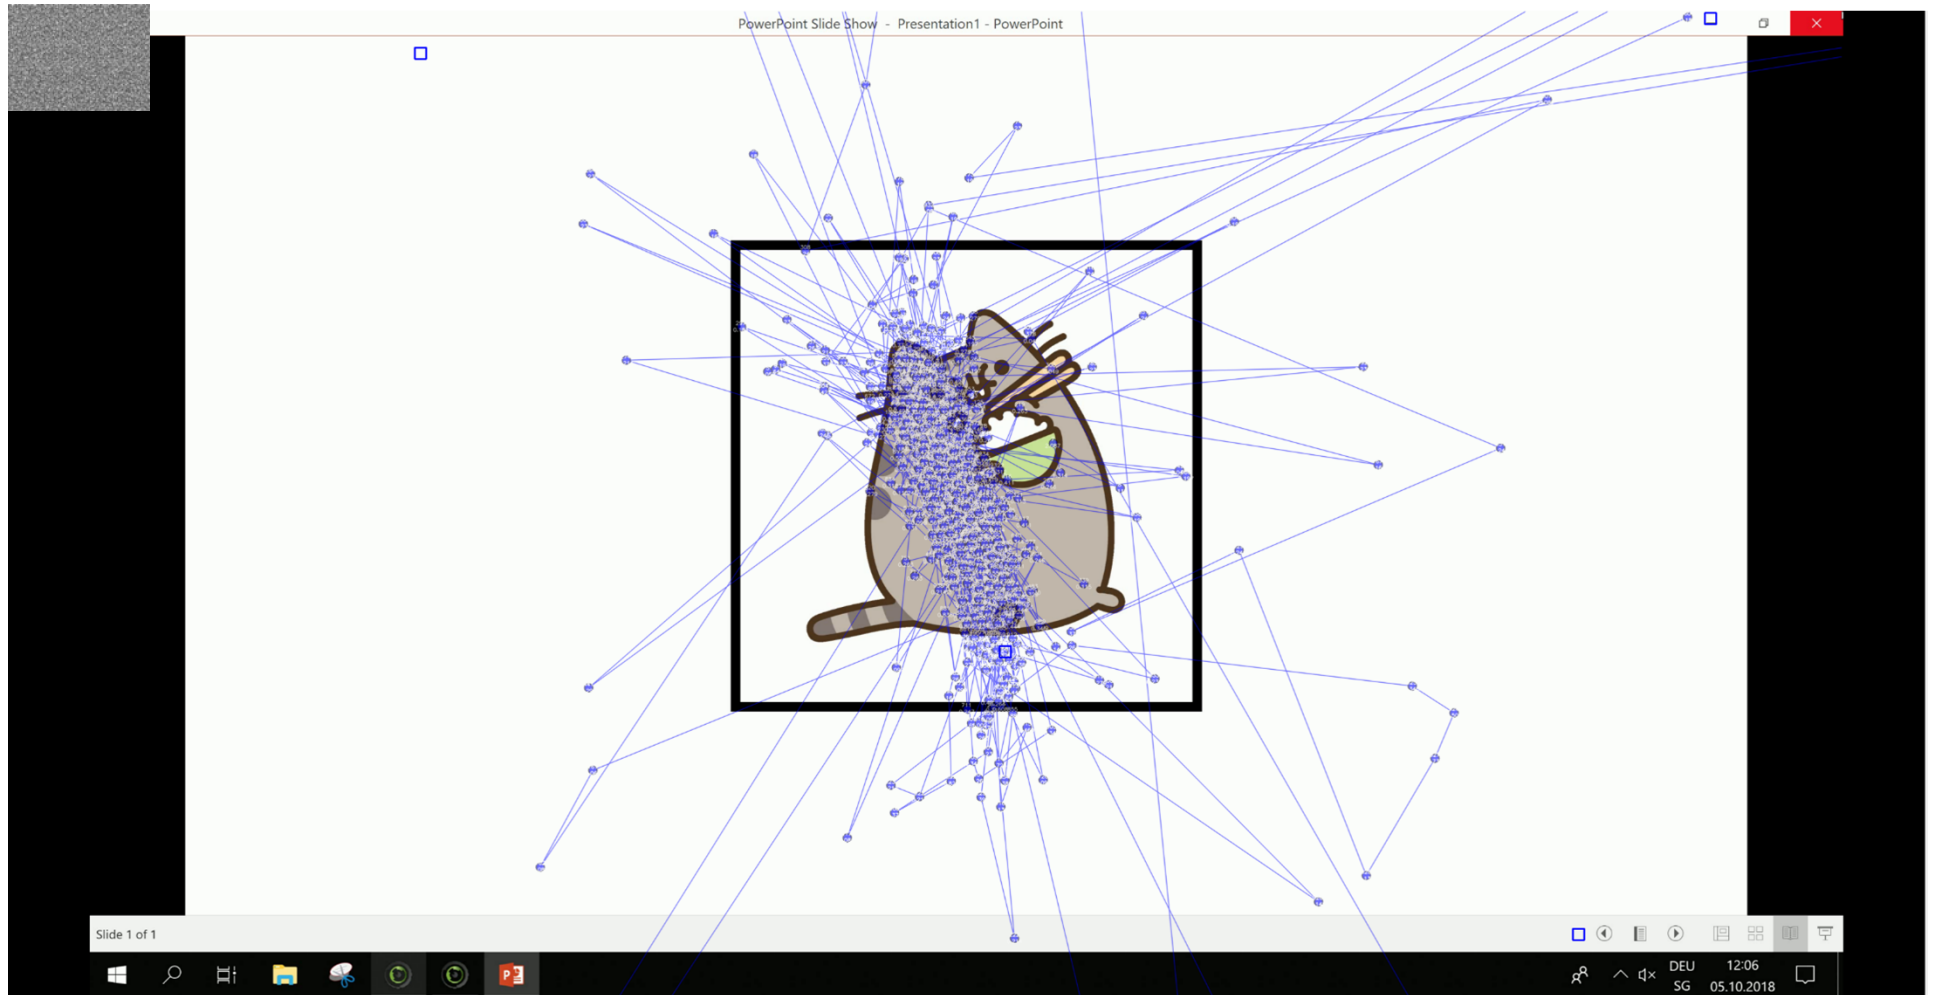

Supplement: jmir_v21i7e13041_app2.pdf [file jmir_v21i7e13041_app2.pdf]
